# Supplementary material
Source: ML conference proceedings conference paper supplement (https://aclanthology.org/2021.findings-emnlp.143)
Supplement: Software [file EMNLP_Appendix.pdf › EMNLP_Appendix.pdf]

# Conical Classification For Computationally Efficient One-Class Topic Determination

## Appendix

### **1 Source Code**

Source code, dataset links, and dependency specifications can be found here:  
<https://github.com/conical-class/ConicalClassification>.
